# Supplementary material for: Resistive force theory and wave dynamics in swimming flagellar apparatus isolated from C. reinhardtii
Source: Royal Society of Chemistry journal article supplement (doi:10.1039/d0sm01969k), 2020-12-10

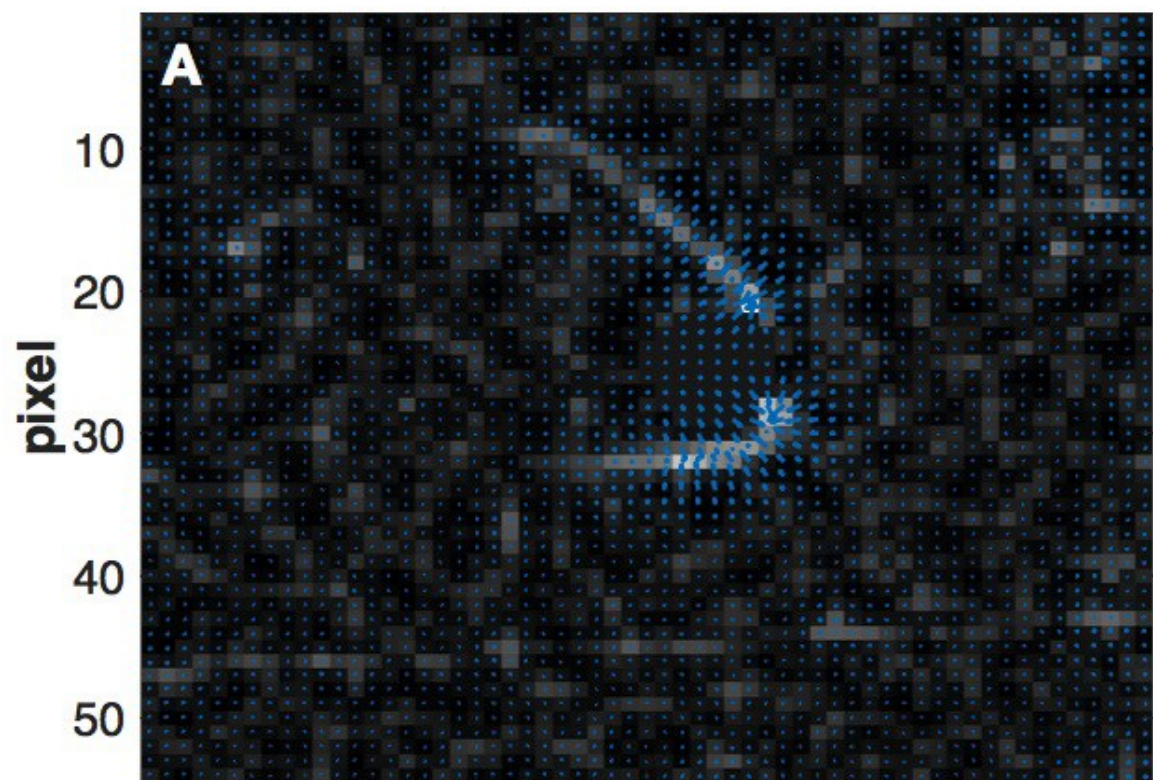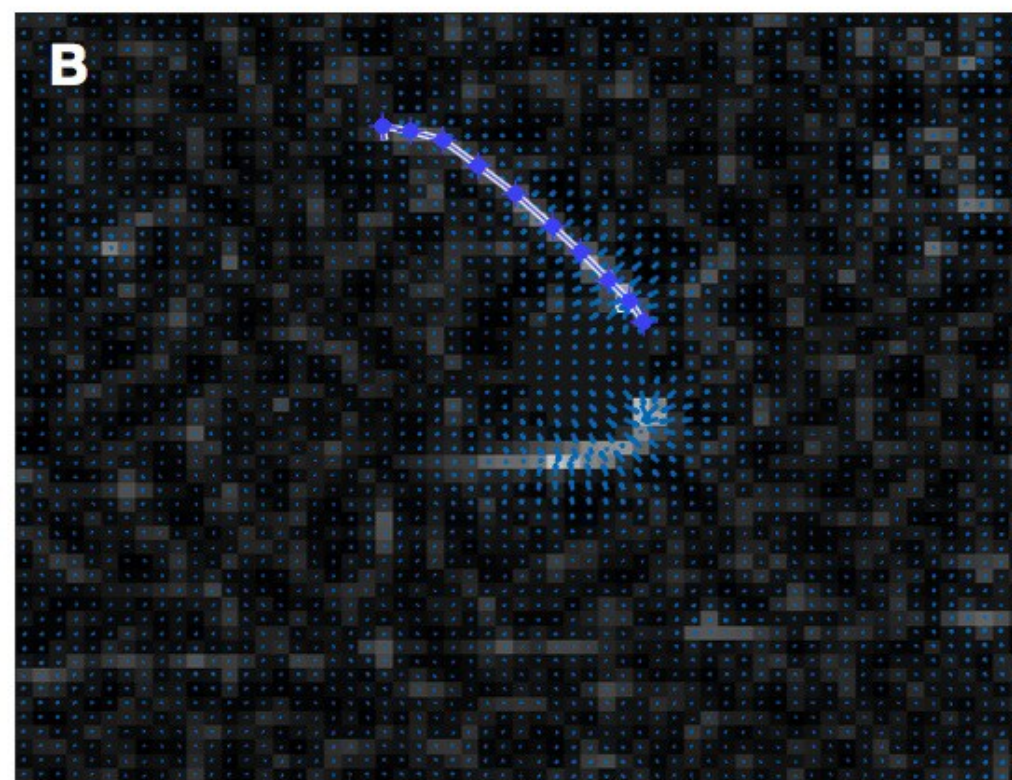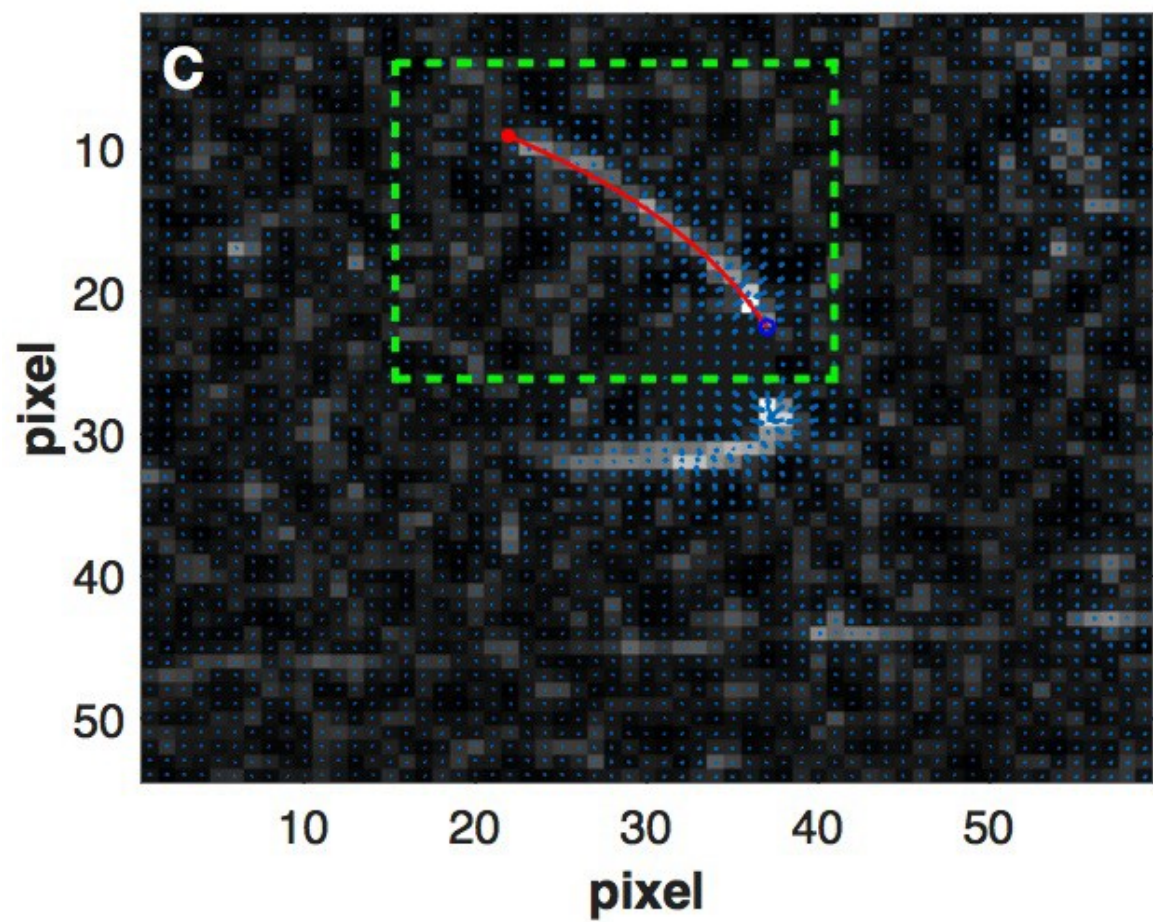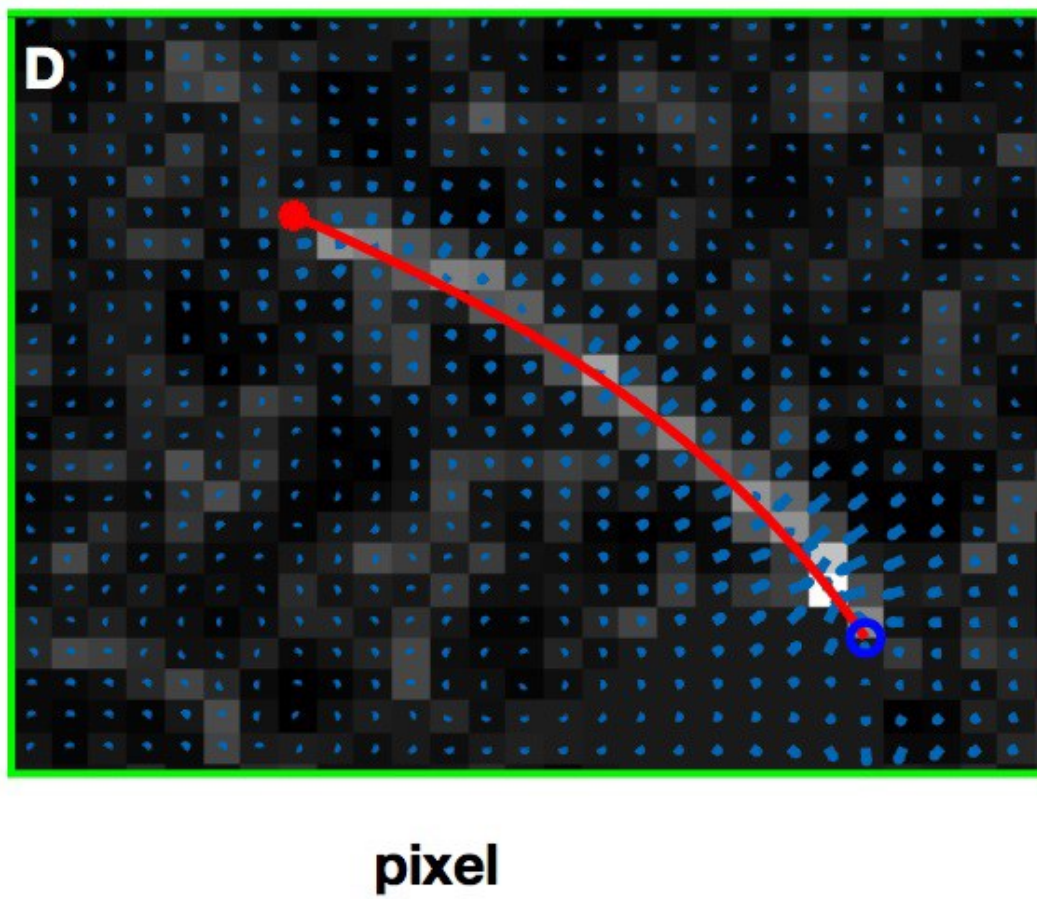

Supplement: d0sm01969k2.pdf [file d0sm01969k2.pdf]
